# Supplementary material
Source: PubMed Central journal article supplement (PMC4922719)
Supplement: JCI84637.sd.pdf [file JCI84637.sd.pdf]

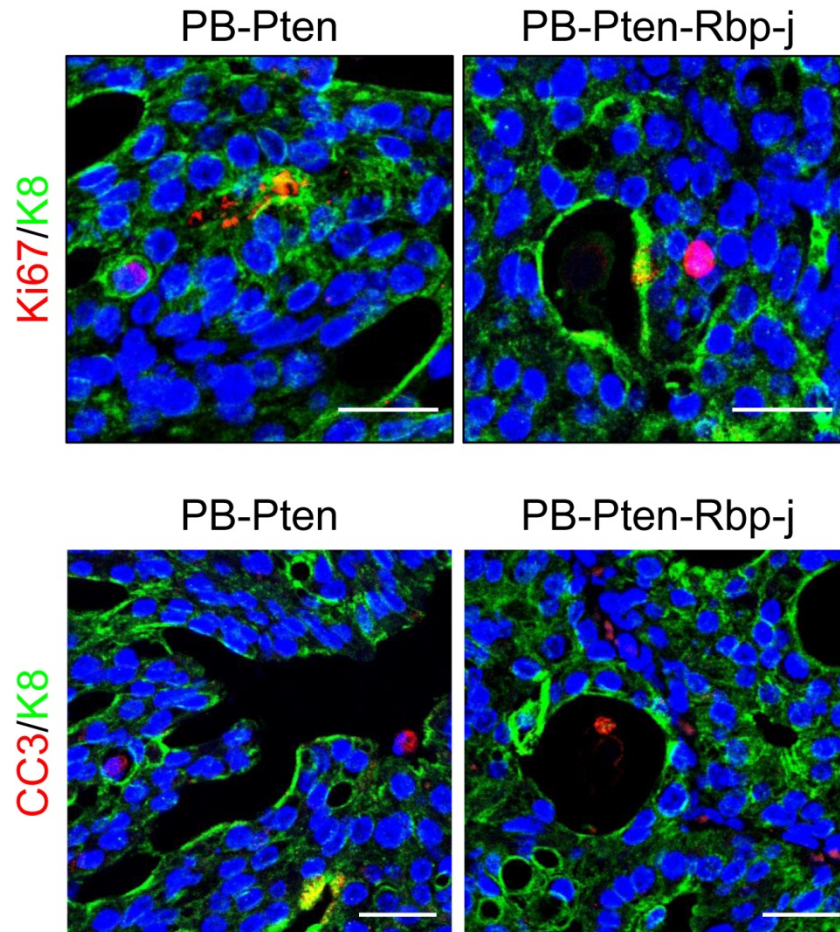

**Supplementary Figure 1:** Coimmunostaining of Ki67 and K8, and cleaved caspase 3 (CC3) and K8 of prostate tissues from 1-yr-old PB-Pten and PB-Pten-Rbp-J mice. Bars=50 $\mu$ m. These images are cropped versions of Figure 2D and 2E, and are zoomed and shown here to facilitate reading of the staining.

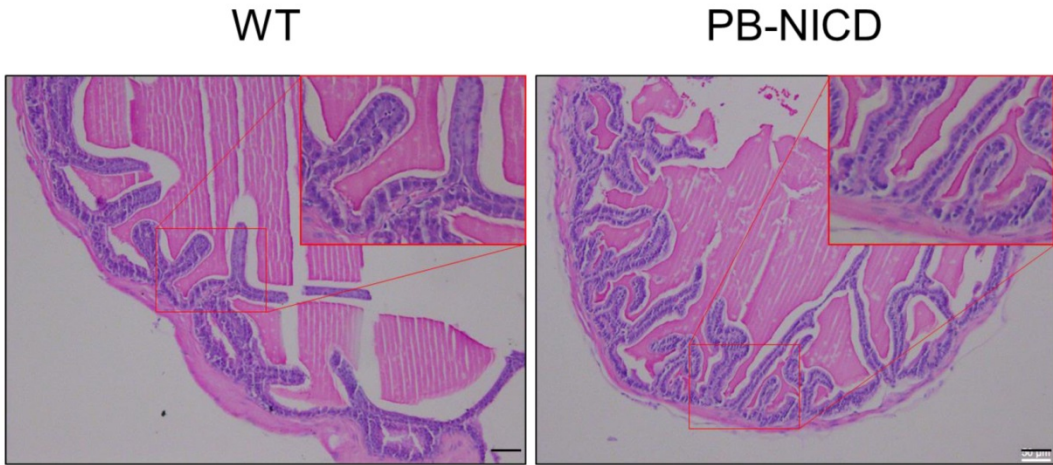

**Supplementary Figure 2:** H&E staining of seminal vesicles of 1.5-yr-old wild type and PB-NICD mice. Bars=50  $\mu$ m.

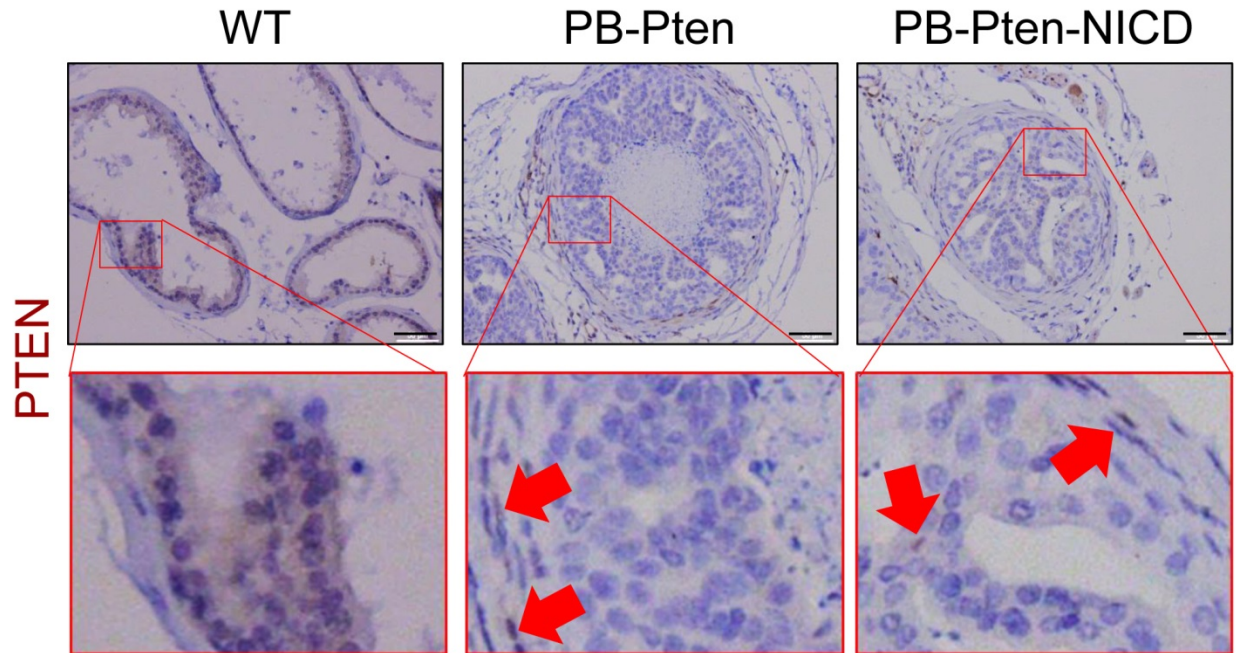

**Supplementary Figure 3:** Immunostaining of PTEN in prostate tissues of 16-wk-old PB-Pten and PB-Pten-NICD mice. Bars=50 $\mu$ m. Arrows point to PTEN staining in stromal cells, which serves as internal positive controls.

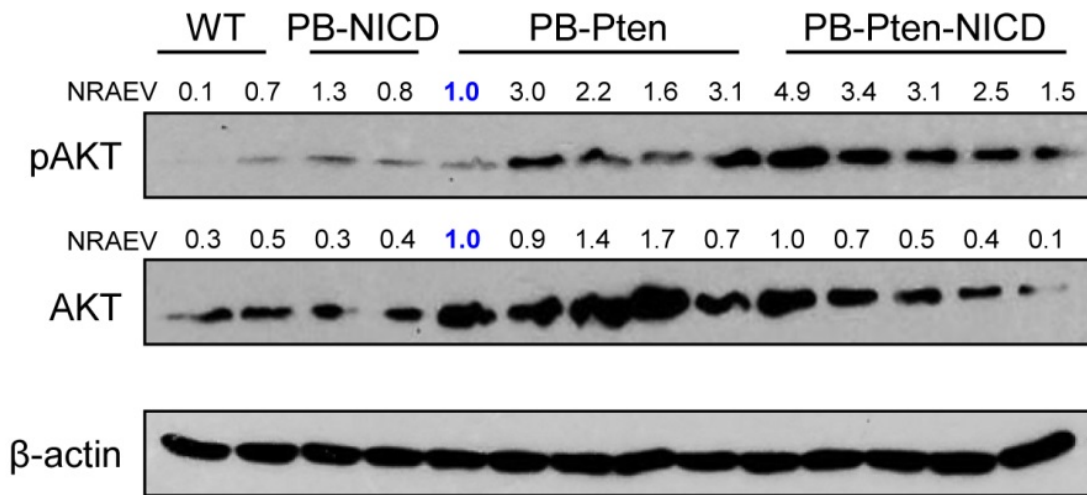

**Supplementary Figure 4:** Western blot analysis of expression of pAKT in prostate tissues of 16-wk-old wild type (WT), PB-NICD, PB-Pten, and PB-Pten-NICD mice. Each lane represents an independent specimen. NRAEV: normalized relative arbitrary expression value by  $\beta$ -actin. Results of AKT and pAKT from PB-Pten (lane 5-9) and PB-Pten-NICD (lane 10-14) were also shown in Figure 8C.

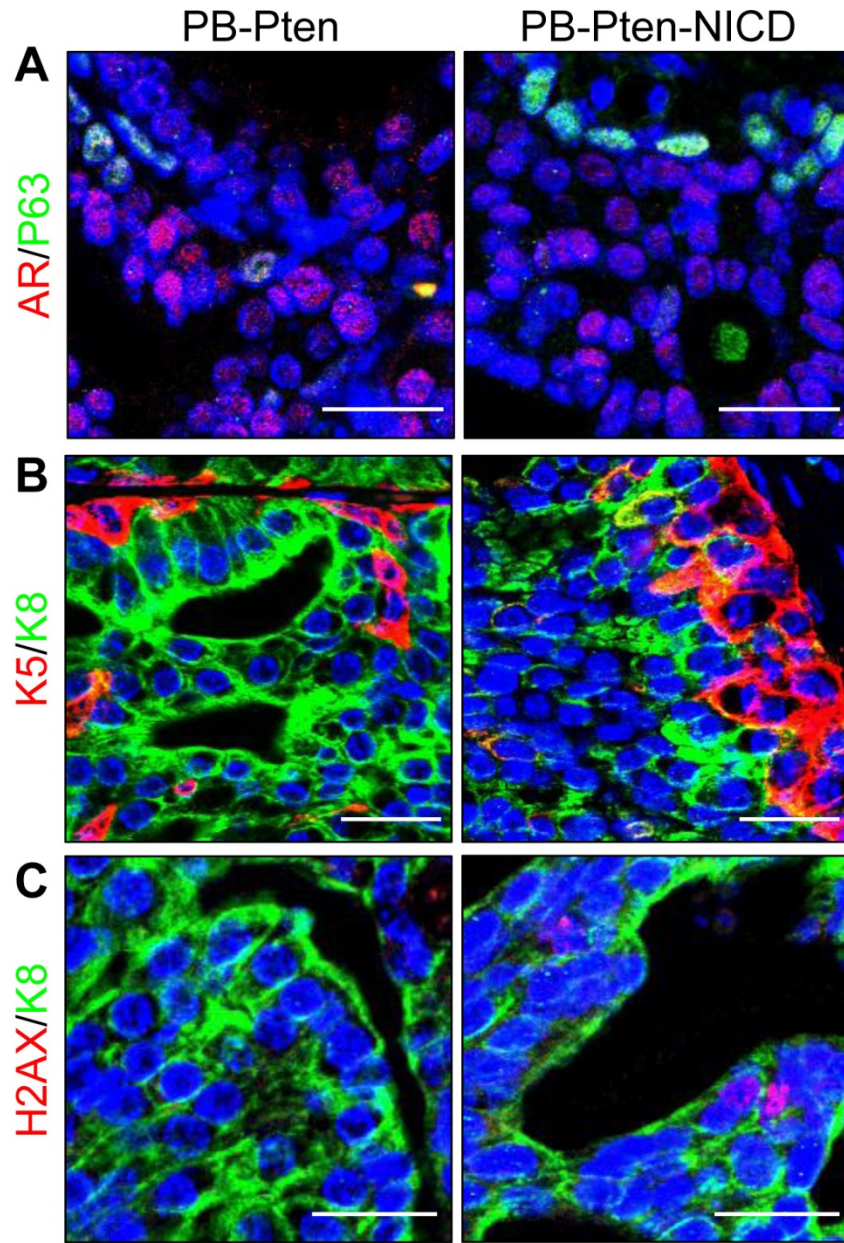

**Supplementary Figure 5:** Coimmunostaining of AR and P63 (A), K5 and K8 (B), and pH2A.X and K8 (C) in prostate tissues of 16-wk-old PB-Pten and PB-Pten-NICD mice. Bars=50 $\mu$ m.

**A**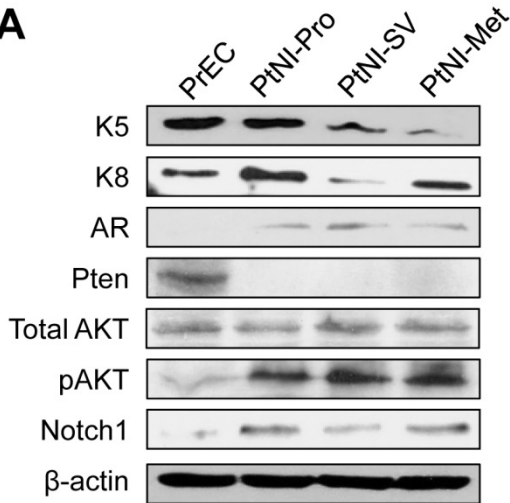**B**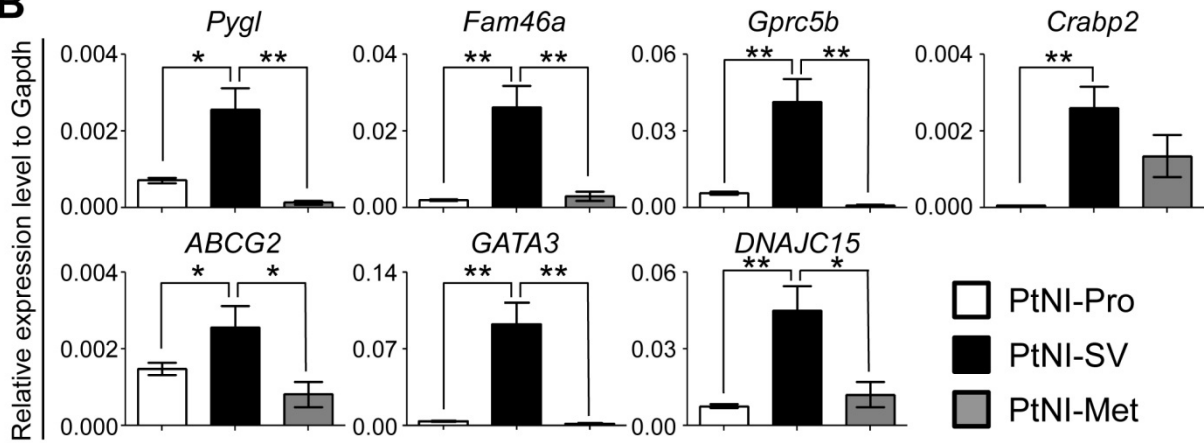

**Supplementary Figure 6:** Characterization of the cell lines established from primary prostate tumors (PtNI-Pro), primary seminal vesicle tumors (PtNI-SV) and lung metastasis (PtNI-Met) in PB-Pten-NICD mice. **(A)** Western blot analysis of expression of Keratin5 (K5), Keratin 8 (K8), androgen receptor (AR), Pten, AKT, pAKT, and Notch1. The primary human prostate basal epithelial cells (PrEC) were used as a control. **(B)** Quantitative RT-PCR analysis of 7 genes in the established cell lines from 3 different experiments. These are representative genes expressed at a much higher level in rodent seminal vesicles than in prostate. \*:p<0.05, \*\*:p<0.01, Student's t-test.

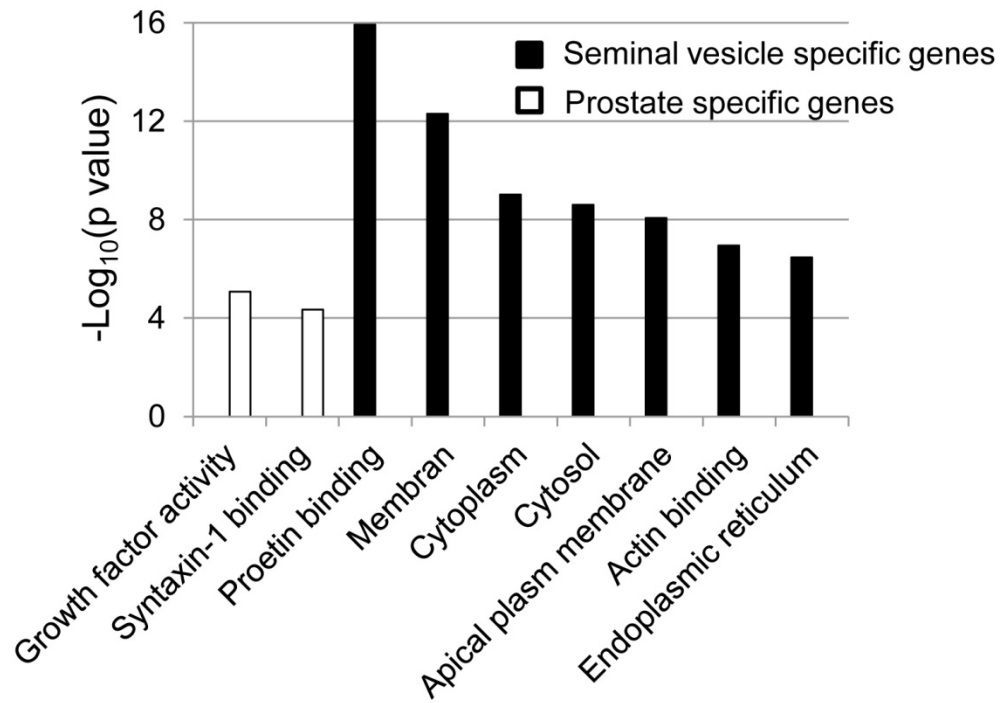

**Supplementary Figure 7:** Gene Ontology pathways that are differentially enriched ( $-\log_{10} p$ -value) in primary prostate and seminal vesicle tumors in PB-Pten-NICD mice, respectively. P values were by one-sided Fisher's exact test.

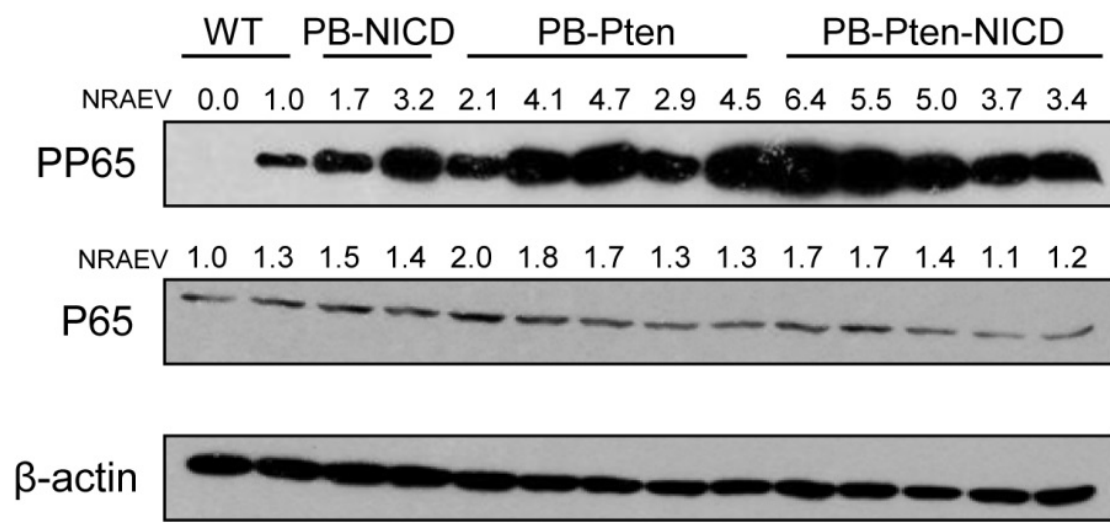

**Supplementary Figure 8:** Western blot analysis of expression of pP65 in prostate tissues of 16-wk-old wild type (WT), PB-NICD, PB-Pten, and PB-Pten-NICD mice. Each lane represents an independent specimen. NRAEV: normalized relative arbitrary expression value by  $\beta$ -actin.



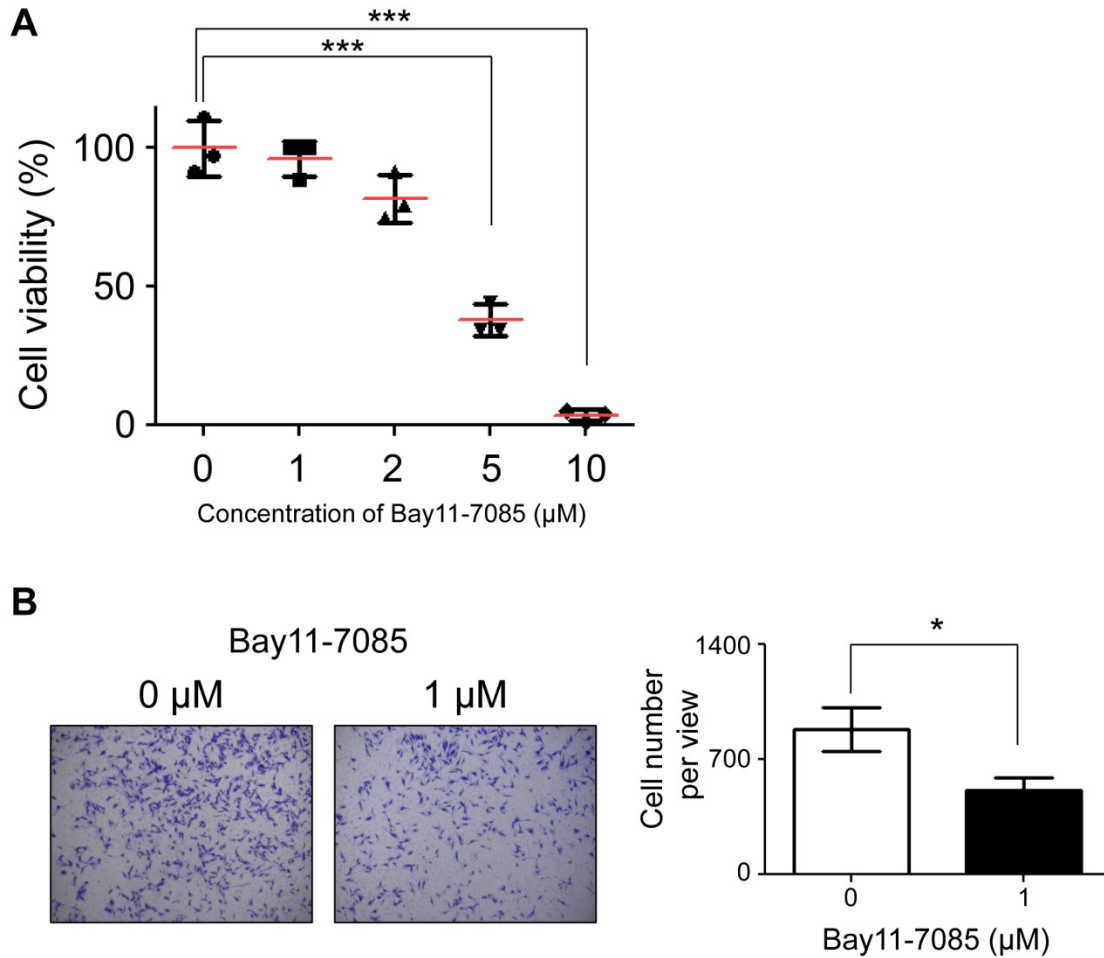

**Supplementary Figure 9: NF- $\kappa$ B signaling is necessary for the survival and migratory capability of PB-Pten-NICD metastatic cell line. (A)** Cell viability assay.  $2 \times 10^4$  cells per well were seeded in 24-well plates and cultured without or with Bay11-7085 at the specified concentration. Cells were counted 2 days later. Dot graphs show means  $\pm$  SD of percentage of final cell numbers normalized by that of the no treatment group from 3 independent experiments. \*\*\*:  $p < 0.001$ , Student's t-test. **(B)** Transwell migration assay of PB-Pten-NICD cells treated without or with  $1 \mu\text{M}$  Bay11-7085. Bar graphs show means  $\pm$  SD of migrated cells per well from 3 independent experiments. \*:  $p < 0.05$ , Student's t-test.

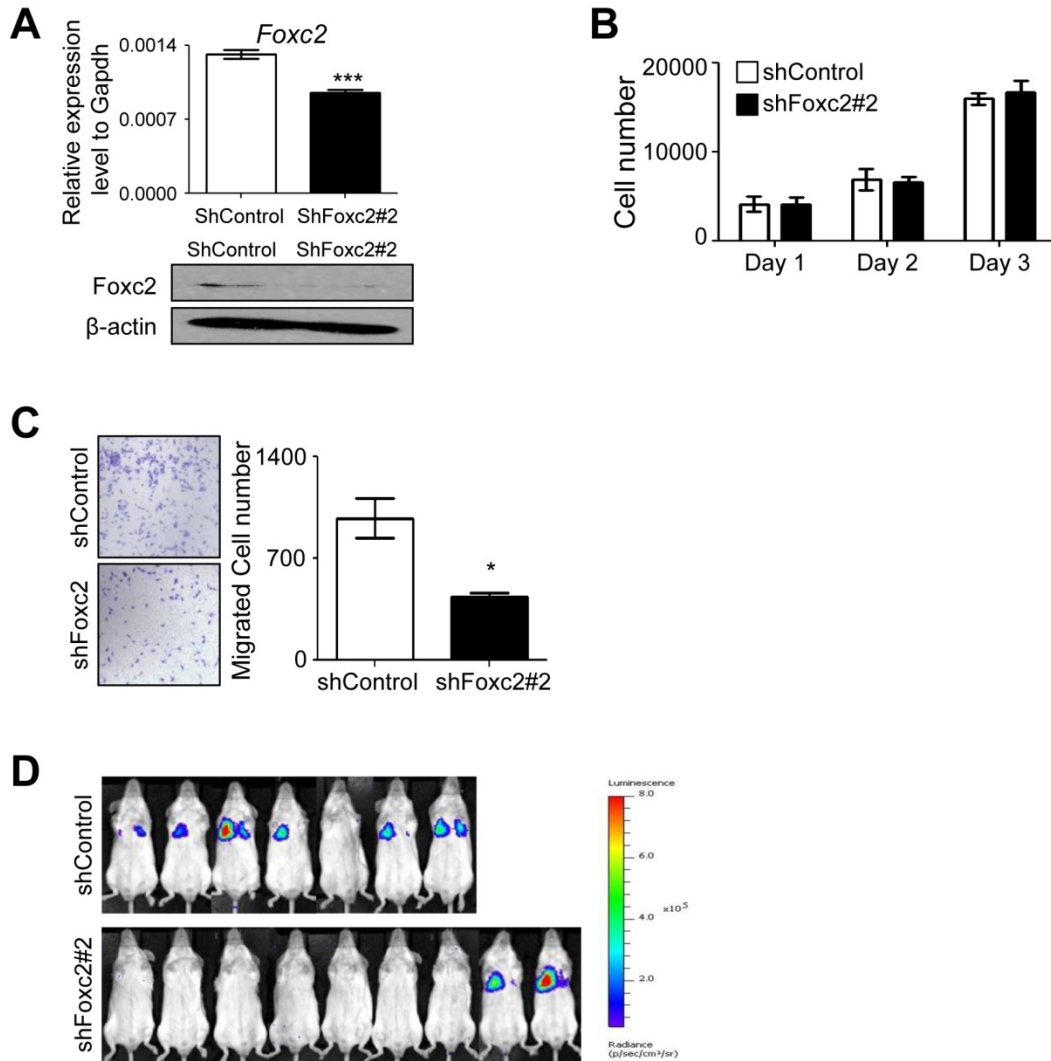

**Supplementary Figure 10: Suppressing FoxC2 by a second shRNA also reduces the capacities of PB-Pten-NICD cells for invasion in vitro and distal metastasis in vivo. (A)** QRT-PCR and Western blot analyses show successful knockdown of *FoxC2* by shRNA#2. \*\*\*:  $p < 0.001$ . **(B)** Growth curves of PB-Pten-NICD metastatic cell line infected with scrambled shRNA control and *FoxC2* shRNA#2 lentivirus. **(C)** Transwell migration assay. Bar graphs show means  $\pm$  SD of migrated cells per well from 3 independent experiments. \*:  $p < 0.05$ , Student's t-test. **(D)** NOD/SCID mice were inoculated with  $2 \times 10^6$  cells each in individual groups via tail vein. Mice were imaged 5 weeks later. *Foxc2* shRNA reduced the capacity of PB-Pten-NICD cells to form distal metastases in the lung ( $p = 0.019$ , Fisher's exact test).

**Supplementary Table 1: Mouse genotyping primers**

| Primers         | Sequences (5' to 3')           |
|-----------------|--------------------------------|
| Cre forward     | CCTGACAGTGACGGTCCAAAG          |
| Cre reverse     | CATGACTCTTCAACTCAAAC           |
| RBP-J forward   | GAAGGTCGGTTGACACCAGATAGC       |
| RBP-J reverse 1 | ATGTACATTTTGTACTCACAGAGATGGATG |
| RBP-J reverse 2 | TAATGCACACAAGCATTGTCTGAGTTC    |
| ICN forward     | TAAGCCTGCCCAGAAGACTC           |
| ICN reverse 1   | GAAAGACCGCGAAGAGTTTG           |
| ICN reverse 2   | AAAGTCGCTCTGAGTTGTTAT          |
| Pten forward    | CAAGCACTCTGCGAACTGAG           |
| Pten reverse    | AAGTTTTTGAAGGCAAGA             |

**Supplementary Table 2: Mouse qRT-PCR Primers**

| Primers        | Sequences (5' – 3')    |
|----------------|------------------------|
| Notch1 forward | ACTGTGAGGACGAGGTGGAC   |
| Notch1 reverse | ACAGGCACTCGTTGATCTCC   |
| Hey1 forward   | GGTACCCAGTGCCTTTGAGA   |
| Hey1 reverse   | GTGCGCGTCAAATAACCTT    |
| Jag1 forward   | CCCAACTGTGAAATTGCTGA   |
| Jag1 reverse   | CAGCCTGGAGAACACTCACA   |
| CcnD1 forward  | AGTGCGTGCAGAAGGAGATT   |
| CcnD1 reverse  | AGCGGGAAGACCTCCTCTT    |
| CcnD2 forward  | GCTGTGCATTTACACCGACA   |
| CcnD2 reverse  | CCACTTCAGCTTACCCAACA   |
| Nrarp forward  | AGGGCCAGACAGCACTACAC   |
| Nrarp reverse  | CGGTTAGCTAGGCGGATGT    |
| Puma forward   | TGTGGAGGAGGAGGAGTGG    |
| Puma reverse   | CGATGCTGCTCTTCTTGTCTC  |
| Noxa forward   | GCTACAGCAAGTGCCCAAG    |
| Noxa reverse   | ACAGAAGCCACCACCTTAGC   |
| Bax forward    | GCTGATGGCAACTTCAACTG   |
| Bax reverse    | GATCAGCTCGGGCACTTTAG   |
| Fn1 forward    | TCTGGGACTGTACCTGCATC   |
| Fn1 reverse    | TGTAGGACTGACCCCCTTCA   |
| Cdh2 forward   | TGGATCGAGAGCTGATAGCC   |
| Cdh2 reverse   | CAATGTCAATGGGGTTCTCC   |
| Foxc2 forward  | CAGCTACTGGACGCTCGAC    |
| Foxc2 reverse  | GGGCACATCCTTCTTCTTGA   |
| Snai1 forward  | CTTGTGTCTGCACGACCTGT   |
| Snai1 reverse  | GAGCAGGAGAATGGCTTCTC   |
| Snai2 forward  | GATCTGTGGCAAGGCTTTCT   |
| Snai2 reverse  | CCTATTGCAGTGAGGGCAAG   |
| Ocln forward   | CCTGGAGGTACTGGTCTCTACG |
| Ocln reverse   | AATCATGAACCCAGGACAA    |
| Cdh1 forward   | AATGAAAAGGGCGAATTTCC   |
| Cdh1 reverse   | GCCGGTGATGCTGTAGAAAA   |
| DSP forward    | GAGCGACAAGAACAACAACA   |
| DSP reverse    | TTCCTTTTCCTTGACCTCCA   |

**Supplementary Table 3: Antibodies for Western blot analyses**

| Antigen              | Supplier                                                   | Species | Dilution |
|----------------------|------------------------------------------------------------|---------|----------|
| K5                   | Covance #PRB-160P                                          | Rabbit  | 1:2000   |
| K8                   | Covance #MMS-162P                                          | Mouse   | 1:1000   |
| AR                   | Santa Cruz, sc-816                                         | Rabbit  | 1:200    |
| Fibronectin 1        | BD bioscience, 610077                                      | Mouse   | 1:1000   |
| Notch1               | Cell Signaling, 3608                                       | Rabbit  | 1:1000   |
| Notch1               | Thermal Fisher, MA1-81888                                  | Mouse   | 1:500    |
| Foxc2                | Gift from Dr. Naoyuki Miura at Hamamatsu University, Japan | Rat     | 1:500    |
| Vimentin             | Cell Signaling, 5741                                       | Rabbit  | 1:1000   |
| $\beta$ -actin       | Sigma, A5441                                               | Mouse   | 1:5000   |
| AKT1                 | Cell Signaling, 9272                                       | Rabbit  | 1:1000   |
| phoAKT               | Cell Signaling, 4060                                       | Rabbit  | 1:1000   |
| MAPK                 | Cell Signaling, 9102                                       | Rabbit  | 1:1000   |
| pMAPK                | Cell Signaling, 4370                                       | Rabbit  | 1:1000   |
| P53                  | Protein tech,10442-1-AP                                    | Rabbit  | 1:500    |
| Pp53                 | Cell Signaling,9284                                        | Rabbit  | 1:1000   |
| $\alpha$ -Rat HRP    | Santa Cruz, sc-2032                                        | Goat    | 1:5000   |
| $\alpha$ -Mouse HRP  | Vector Lab. PI-2000                                        | Goat    | 1:5000   |
| $\alpha$ -Rabbit HRP | Vector Lab. PI-1000                                        | Goat    | 1:5000   |

**Supplementary Table 4: Antibodies for IHC analyses**

| Antigen              | Supplier                    | Species | Dilution |
|----------------------|-----------------------------|---------|----------|
| K5                   | Covance #PRB-160P           | Rabbit  | 1:2000   |
| K8                   | Covance #MMS-162P           | Mouse   | 1:1000   |
| K14                  | Biogenex MU146-UC           | Mouse   | 1:100    |
| GFP                  | Clontech, JL8               | Mouse   | 1:1000   |
| P63                  | Santa Cruz, 4A4             | Mouse   | 1:200    |
| Ki67                 | Novocastra, NCL-Ki67-P      | Rabbit  | 1:1000   |
| AR                   | Santa Cruz, sc-816          | Rabbit  | 1:200    |
| pAKT                 | Cell Signaling, 4060        | Rabbit  | 1:500    |
| Cleaved caspase3     | Cell Signaling, 9661S       | Rabbit  | 1:1000   |
| Vimentin             | Cell Signaling, 5741        | Rabbit  | 1:500    |
| Smooth muscle actin  | Sigma-Aldrich               | Mouse   | 1:2000   |
| Pho- $\gamma$ H2A.X  | Cell signaling, 9718        | Rabbit  | 1:400    |
| $\alpha$ -Mouse      | Invitrogen/Molecular Probes | Goat    | 1:2000   |
| $\alpha$ -Rabbit     | Invitrogen/Molecular Probes | Goat    | 1:2000   |
| $\alpha$ -Rabbit HRP | Vector Lab, PI-1000         | Goat    | 1:5000   |
